# Supplementary material for: Reduced GRAMD1C expression correlates to poor prognosis and immune infiltrates in kidney renal clear cell carcinoma
Source: PeerJ journal article supplement (doi:10.7717/peerj.8205), 2019-12-20

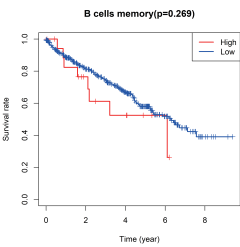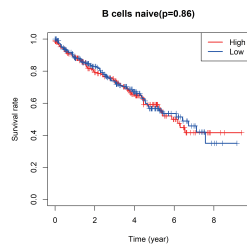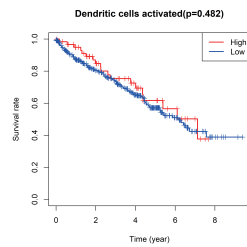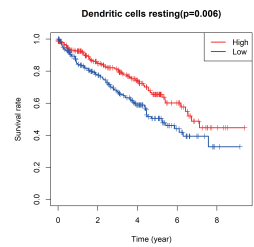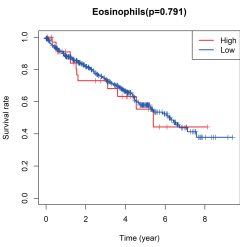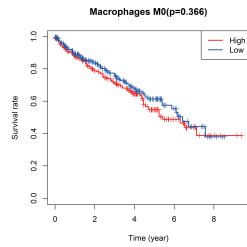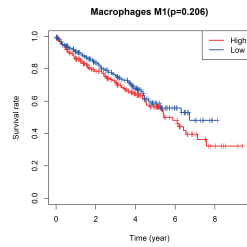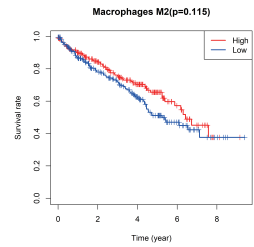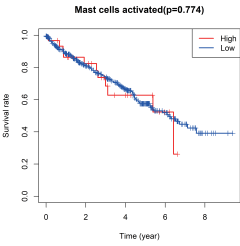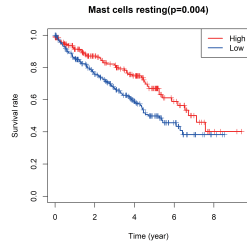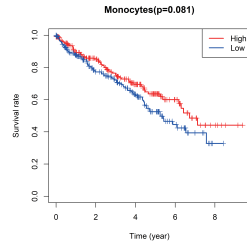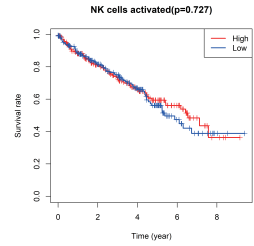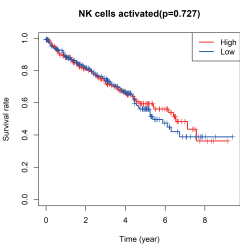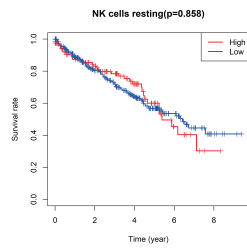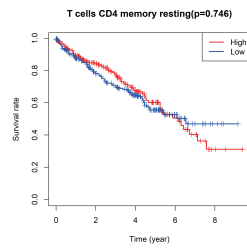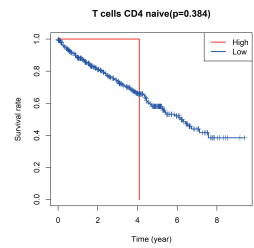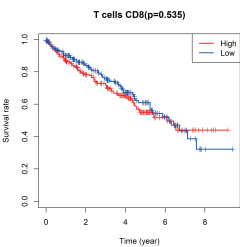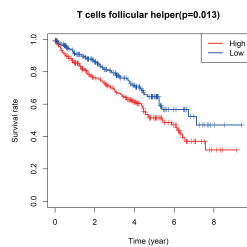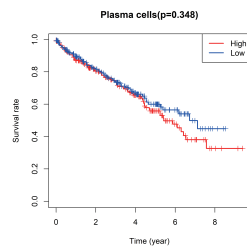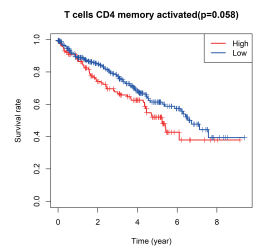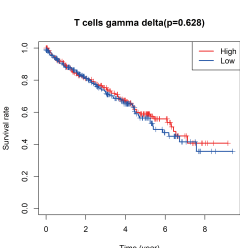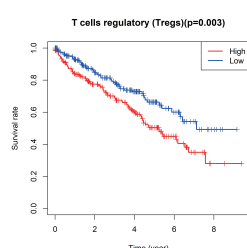

Supplement: supplementary_figure_2.pdf [file supplementary_figure_2.pdf]
