# Supplementary material for: Reduced GRAMD1C expression correlates to poor prognosis and immune infiltrates in kidney renal clear cell carcinoma
Source: PubMed Central journal article supplement (PMC6927341; doi:10.7717/peerj.8205), 2019-12-20
Supplement: peerj-07-8205-s001.pdf [file peerj-07-8205-s001.pdf]

100%  
80%  
60%  
40%  
20%  
0%

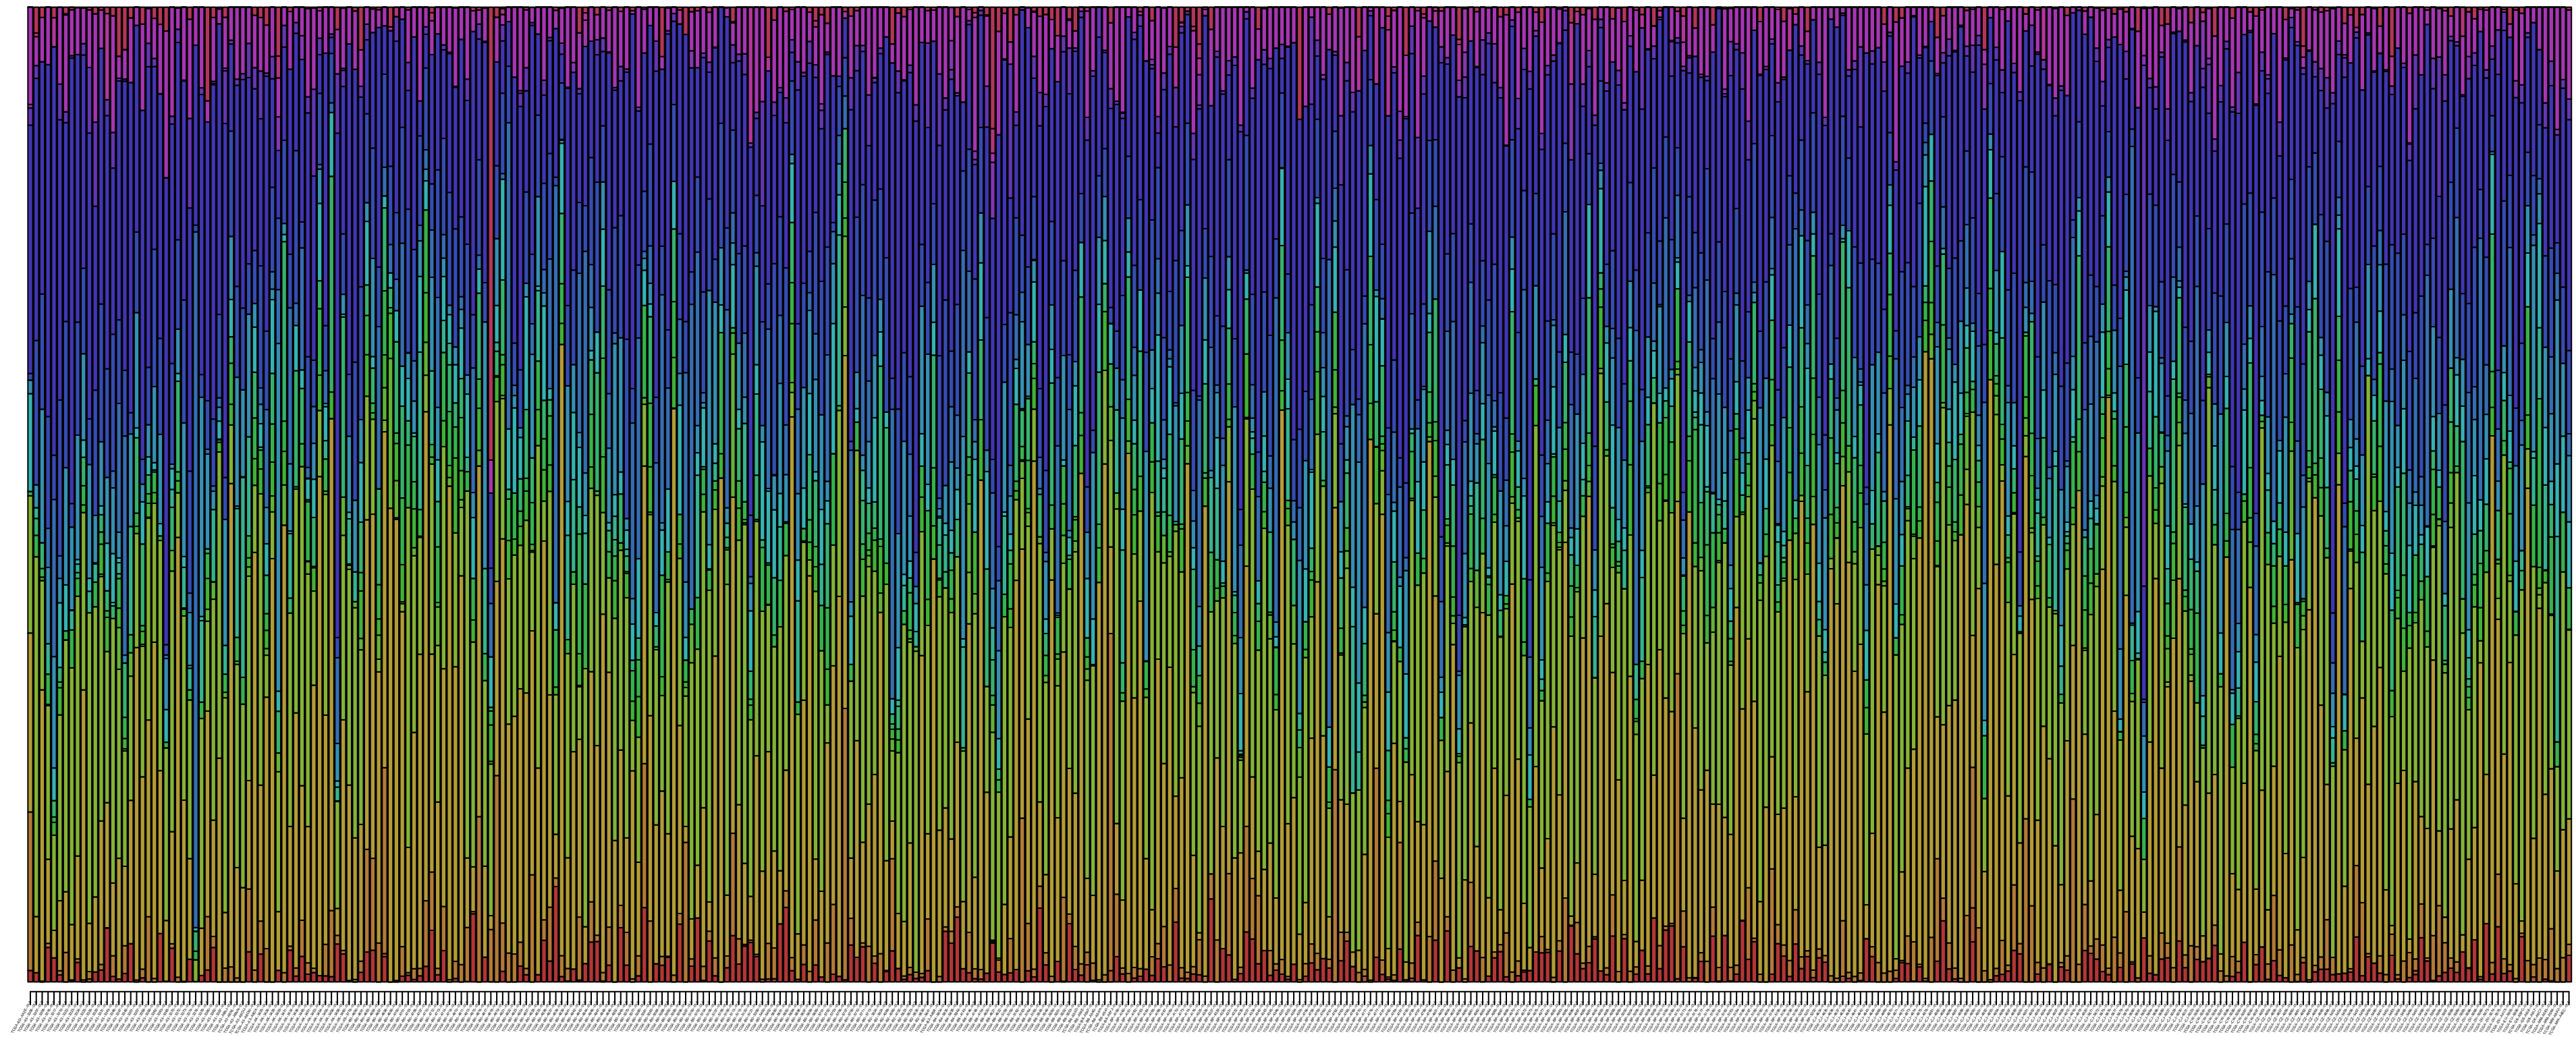

- B cells naive
- B cells memory
- Plasma cells
- T cells CD8
- T cells CD4 naive
- T cells CD4 memory resting
- T cells CD4 memory activated
- T cells follicular helper
- T cells regulatory (Tregs)
- T cells gamma delta
- NK cells resting
- NK cells activated
- Monocytes
- Macrophages M0
- Macrophages M1
- Macrophages M2
- Dendritic cells resting
- Dendritic cells activated
- Mast cells resting
- Mast cells activated
- Eosinophils
- Neutrophils
